# Supplementary material for: Adult Exposures to Toxic Trace Elements as Measured in Nails along the Interoceanic Highway in the Peruvian Amazon
Source: MDPI journal article supplement (doi:10.3390/ijerph19106335), 2022-05-23
Supplement: s1 [file s1]

# Adult Exposures to Toxic Trace Elements as Measured in Nails along the Interoceanic Highway in the Peruvian Amazon

## Supplementary Tables

Table S1. Adult participants in IMAS at baseline (2011) compared to follow up (2014), Madre de Dios, Peru.

| Characteristic | 2011 Sample | 2014 Sample |     | Dropped Out      |     | Chi Sq. P-Value |
|----------------|-------------|-------------|-----|------------------|-----|-----------------|
|                | n           | n           | %   | n                | %   |                 |
| Female         | 853         | 493         | 58% | 360              | 42% | 0.1559          |
| Male           | 969         | 528         | 54% | 441              | 46% |                 |
| Age (years)    |             |             |     | (T-Test P-Value) |     | 0.1435          |
| Rural          | 1191        | 657         | 55% | 534              | 45% | 0.3020          |
| Community      |             |             |     |                  |     |                 |
| Urban          | 631         | 364         | 58% | 267              | 42% | < .0001         |
| Community      |             |             |     |                  |     |                 |
| District       |             |             |     |                  |     |                 |
| Huepetuhe      | 118         | 70          | 59% | 48               | 41% | < .0001         |
| Inambari       | 284         | 160         | 56% | 124              | 44% |                 |
| Laberinto      | 255         | 91          | 36% | 164              | 64% |                 |
| Tambopata      | 354         | 220         | 62% | 134              | 38% |                 |
| Las Piedras    | 474         | 274         | 58% | 200              | 42% |                 |
| Tahuamanu      | 164         | 97          | 59% | 67               | 41% |                 |
| Iberia         | 73          | 45          | 62% | 28               | 38% |                 |
| Inapari        | 100         | 64          | 64% | 36               | 36% |                 |

Table S2. Characteristics of Adults in the IMAS Study Population (2014) who provided nail samples compared to those who did not, Madre de Dios, Peru.

| Characteristic | Total | Gave nails |     | Didn't give nails |     | Chi Sq.<br>P-Value |
|----------------|-------|------------|-----|-------------------|-----|--------------------|
|                | n     | n          | %   | n                 | %   |                    |
| Female         | 309   | 218        | 71% | 91                | 29% | 0.0016             |
| Male           | 341   | 200        | 59% | 141               | 41% |                    |
| Smoking Status |       |            |     |                   |     |                    |
| Non-Smoker     | 482   | 294        | 61% | 188               | 39% | 0.0083             |

|                                                          |     |     |     |      |                  |     |        |
|----------------------------------------------------------|-----|-----|-----|------|------------------|-----|--------|
| Former Smoker                                            |     | 57  | 42  | 74%  | 15               | 26% |        |
| Current Smoker                                           |     | 107 | 80  | 75%  | 27               | 25% |        |
| Age                                                      |     |     |     |      |                  |     |        |
| Under 30                                                 |     | 119 | 69  | 58%  | 50               | 42% |        |
| 30-44                                                    |     | 197 | 124 | 63%  | 73               | 37% | 0.1421 |
| 45-59                                                    |     | 185 | 126 | 68%  | 59               | 32% |        |
| Over 60                                                  |     | 135 | 95  | 70%  | 40               | 30% |        |
| Continuous Age                                           |     |     |     |      | (T-Test P-Value) |     |        |
| Length of time in current district                       |     |     |     |      |                  |     |        |
| > 10 years                                               |     | 497 | 325 | 65%  | 172              | 35% |        |
| 6-10 years                                               |     | 79  | 51  | 65%  | 28               | 35% | 0.3508 |
| ≤ 5 years                                                |     | 74  | 42  | 57%  | 32               | 43% |        |
| Birth Region                                             |     |     |     |      |                  |     |        |
| Rainforest                                               |     | 247 | 165 | 67%  | 82               | 33% |        |
| Andean                                                   |     | 279 | 176 | 63%  | 103              | 37% | 0.5949 |
| Coastal                                                  |     | 41  | 25  | 61%  | 16               | 39% |        |
| Individual Economic Activity Income (Peruvian New Soles) |     |     |     |      |                  |     |        |
| No income                                                |     | 253 | 157 | 62%  | 96               | 38% |        |
| 200-3000                                                 |     | 92  | 67  | 73%  | 25               | 27% |        |
| 3100-7200                                                |     | 95  | 53  | 56%  | 42               | 44% | 0.0777 |
| 7300-12000                                               |     | 124 | 87  | 70%  | 37               | 30% |        |
| 12100- 67500                                             |     | 86  | 54  | 63%  | 32               | 37% |        |
| Economic Activity                                        |     |     |     |      |                  |     |        |
| Agricultural Work                                        | No  | 473 | 294 | 62%  | 179              | 38% | 0.0613 |
|                                                          | Yes | 177 | 124 | 70%  | 53               | 30% |        |
| Timber Industry                                          | No  | 618 | 401 | 65%  | 217              | 35% | 0.1757 |
|                                                          | Yes | 32  | 17  | 53%  | 15               | 47% |        |
| Brazil Nut Harvesting                                    | No  | 627 | 400 | 64%  | 227              | 36% | 0.1550 |
|                                                          | Yes | 23  | 18  | 78%  | 5                | 22% |        |
| Fisherman                                                | No  | 640 | 408 | 64%  | 232              | 36% | 0.0176 |
|                                                          | Yes | 10  | 10  | 100% | 0                | 0%  |        |
| Merchant                                                 | No  | 606 | 394 | 65%  | 212              | 35% | 0.1616 |
|                                                          | Yes | 44  | 24  | 55%  | 20               | 45% |        |
| Miner                                                    | No  | 638 | 409 | 64%  | 229              | 36% | 0.4352 |
|                                                          | Yes | 12  | 9   | 75%  | 3                | 25% |        |
| Professional/Technical                                   | No  | 633 | 408 | 64%  | 225              | 36% | 0.6325 |
|                                                          | Yes | 17  | 10  | 59%  | 7                | 41% |        |
| Employee of a<br>store/restaurant/warehouse              | No  | 626 | 399 | 64%  | 227              | 36% | 0.1216 |
|                                                          | Yes | 24  | 19  | 79%  | 5                | 21% |        |
| Taxi driver/transportation                               | No  | 620 | 404 | 65%  | 216              | 35% | 0.0389 |
|                                                          | Yes | 30  | 14  | 47%  | 16               | 53% |        |
| Other work                                               | No  | 588 | 377 | 64%  | 211              | 36% | 0.7530 |
|                                                          | Yes | 62  | 41  | 66%  | 21               | 34% |        |
| District                                                 |     |     |     |      |                  |     |        |

|                 |     |     |     |     |     |        |
|-----------------|-----|-----|-----|-----|-----|--------|
| Huepetuhe       | 38  | 15  | 39% | 23  | 61% | 0.0006 |
| Inambari        | 106 | 54  | 51% | 52  | 49% |        |
| Laberinto       | 52  | 33  | 63% | 19  | 37% |        |
| Tambopata       | 146 | 101 | 69% | 45  | 31% |        |
| Las Piedras     | 170 | 118 | 69% | 52  | 31% |        |
| Tahuamanu       | 57  | 37  | 65% | 20  | 35% |        |
| Iberia          | 33  | 23  | 70% | 10  | 30% |        |
| Inapari         | 48  | 37  | 77% | 11  | 23% | 0.0606 |
| Rural Community | 431 | 288 | 67% | 143 | 33% |        |
| Urban Community | 219 | 130 | 59% | 89  | 41% |        |

Table S3. Individual Birth Region by Selected Characteristics.

| Characteristic             | Individual Birth Region |     |        |     |         |     |       |     | Chi-Sq<br>P-Value |
|----------------------------|-------------------------|-----|--------|-----|---------|-----|-------|-----|-------------------|
|                            | Rainforest              |     | Andean |     | Coastal |     | Total |     |                   |
|                            | n                       | %   | n      | %   | n       | %   | n     | %   |                   |
| Household fish consumption |                         |     |        |     |         |     |       |     |                   |
| Never                      | 0                       | 0%  | 12     | 92% | 1       | 8%  | 13    | 4%  | <.0001            |
| Monthly                    | 57                      | 35% | 95     | 58% | 13      | 8%  | 165   | 45% |                   |
| Weekly                     | 78                      | 53% | 58     | 40% | 10      | 7%  | 146   | 40% |                   |
| Daily                      | 28                      | 70% | 11     | 28% | 1       | 3%  | 40    | 11% |                   |
| Fisherman in household     | 10                      | 77% | 2      | 15% | 1       | 8%  | 13    | 4%  | 0.047             |
| No fisherman in household  | 154                     | 44% | 174    | 49% | 24      | 7%  | 352   | 96% |                   |
| Uses well water            | 43                      | 42% | 45     | 44% | 14      | 14% | 102   | 28% | 0.005             |
| Uses other water source    | 121                     | 46% | 131    | 50% | 11      | 4%  | 263   | 72% |                   |
| Mining occupation          | 5                       | 63% | 2      | 25% | 1       | 13% | 8     | 2%  | 0.069             |
| No mining occupation       | 159                     | 45% | 174    | 49% | 24      | 7%  | 357   | 98% |                   |
| In and adjacent mining     | 31                      | 34% | 58     | 63% | 3       | 3%  | 92    | 25% | 0.003             |
| No in and adjacent mining  | 133                     | 49% | 118    | 43% | 22      | 8%  | 273   | 75% |                   |

Table S4. Trace Element Concentrations and Differences in Trace Element by Nail Type for Adults in the IMAS Study Population, Madre de Dios, Peru (n = 399).

| Trace Element | Fingernail |     | Toenail |     | Total |      | Outlier<br>Status (Chi-<br>Sq) | Logged Element<br>(ANOVA) |
|---------------|------------|-----|---------|-----|-------|------|--------------------------------|---------------------------|
| Total         | 283        | 71% | 116     | 29% | 399   | 100% | P-Value                        | P-Value                   |

|         |             |     |     |     |     |     |     |        |        |
|---------|-------------|-----|-----|-----|-----|-----|-----|--------|--------|
| Arsenic | Non-Outlier | 270 | 71% | 111 | 29% | 381 | 95% | 0.9015 | <.0001 |
|         | Outlier     | 13  | 72% | 5   | 28% | 18  | 5%  |        |        |
| Cadmium | Non-Outlier | 265 | 72% | 105 | 28% | 370 | 93% | 0.2753 | 0.2844 |
|         | All         | 18  | 62% | 11  | 38% | 29  | 7%  |        |        |
| Mercury | Non-Outlier | 258 | 69% | 115 | 31% | 373 | 93% | 0.0034 | 0.0113 |
|         | Outlier     | 25  | 96% | 1   | 4%  | 26  | 7%  |        |        |
| Lead    | Non-Outlier | 242 | 70% | 106 | 30% | 348 | 87% | 0.1114 | 0.0998 |
|         | Outlier     | 41  | 80% | 10  | 20% | 51  | 13% |        |        |

Table S5. Trace Element in Nails Retest Percent Differences, Adults in the IMAS Study Population, Madre de Dios, Peru.

| Element                                 | Mean | Min | Max  |
|-----------------------------------------|------|-----|------|
| As                                      | 16.5 | 0.8 | 45.3 |
| Cd                                      | 25.7 | 2.9 | 88.7 |
| Hg                                      | 13.9 | 0.7 | 34.9 |
| Pb                                      | 19.4 | 1   | 52.7 |
| *Absolute Values of Percent Differences |      |     |      |

## Supplementary Figures

Sample Design: Households in MDD located within 10 km of the IOH having lived at their residence for 6 months prior to the survey

Stage 1: 10 urban and 38 rural localities selected

Stage 2: 636 Households (HH) selected via PPS:

- 18 HH per urban locality
- 12 per rural locality

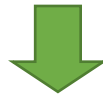

2011 Sample: 558 HH Approached

- 2 rural localities no longer existed- 24 HH
- 31 HH declined (2/3 were in (illegal) mining areas)
- 8 HH abandoned
- 32 No head of HH present each of 3 times approached

487 HH Surveyed (RR All Surveys: 87%)

- 433 HH completed surveys (RR Completed Surveys 78%)
- 54 HH Incomplete surveys
- 1664 individuals

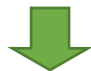

2014: 487 Households Approached

310 Households Surveyed (64% RR all surveys): 231 HH Completed surveys (47% RR completed surveys) + 79 HH Incomplete surveys

1208 people in the HHs:

- 1021 Present
  - 650 Adults – 309 Female / 341 male
  - 371 children (184 female/ 187 male)
- 178 Individuals not present
- 9 deceased

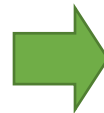

418 Adults gave nail samples (200 males/ 218 females) from 273 households (64% of 650 adult participants).

Figure S1. Study Flow Chart
